# Supplementary material for: Evolution of Streptococcus pneumoniae Serotype 3 in England and Wales: A Major Vaccine Evader
Source: MDPI journal article supplement (doi:10.3390/genes10110845), 2019-10-25
Supplement: s1 [file s1]

ngs_id	Year	ST	Cluster	clade	Tet	NanA	SP2194	strH	PspA	PspC	run_accession
304271	2016	180	4	Clade_II	neg	nanVarIII	SPVarI	strVarII	Family2C5i1	g6	ERR3530735
304293	2016	180	46	Clade_II	TET	nanVarIII	SPVarI	strVarII	Family2C5i1	g6	ERR3531053
308591	2016	180	2	Clade_Ia	neg	nanVarI	SPVarI	strVarII	Family2C3i2	g8	ERR3531049
385862	2017	180	3	Clade_II	TET	nanVarIII	SPVarI	strVarI	Family2C5i1	g6	ERR3601791
393879	2017	180	1	Clade_Ia	neg	nanVarI	SPVarI	strVarI	Family2C3i1	g8	ERR3601501
408581	2017	180	2	Clade_Ia	neg	nanVarI	SPVarI	strVarI	Family2C3i2	g8	ERR3601571
414409	2017	180	2	Clade_Ia	neg	nanVarI	SPVarI	strVarI	Family2C3i1	g8	ERR3601655
414436	2017	180	2	Clade_Ia	neg	nanVarI	SPVarI	strVarI	#NAME?	g8	ERR3601629
422376	2017	180	4	Clade_II	neg	nanVarIII	SPVarI	strVarII	Family2C5i1	g6	ERR3601799
423061	2017	180	1	Clade_Ia	neg	nanVarI	SPVarI	strVarI	Family2C3i1	g8	ERR3601884
427003	2017	233	10	External	neg	nanVarIII	SPVarI	strVarI	Family1C2v3	g11	ERR3601917
427466	2017	180	26	Clade_Ia	neg	nanVarI	SPVarI	strVarII	Family2C3i1	g8	ERR3601834
429093	2017	180	3	Clade_II	TET	nanVarIII	SPVarI	strVarI	Family2C5i1	g6	ERR3601933
432820	2017	180	3	Clade_II	TET	nanVarIII	SPVarI	strVarII	Family2C5i1	g6	ERR3602080
432862	2017	180	2	Clade_Ia	neg	nanVarI	SPVarI	strVarII	Family2C3i1	-	ERR3601814
433542	2017	180	4	Clade_II	neg	nanVarIII	SPVarI	strVarI	Family2C5i1	g6	ERR3601756
433559	2017	180	16	Clade_Ib	neg	nanVarI	SPVarII	strVarI	Family2C3i1	g10	ERR3601919
435557	2017	180	2	Clade_Ia	neg	nanVarI	SPVarI	strVarII	Family2C3i1	g8	ERR3601827
436999	2017	180	3	Clade_II	TET	nanVarIII	SPVarI	strVarII	Family2C5i1	g6	ERR3601485
437102	2017	180	4	Clade_II	neg	nanVarIII	SPVarI	strVarI	Family2C5i1	g6	ERR3601582
438754	2017	180	2	Clade_Ia	neg	nanVarI	SPVarI	strVarII	Family2C3i1	g8	ERR3601667
441544	2017	180	2	Clade_Ia	neg	nanVarI	SPVarI	strVarI	Family2C3i2	g8	ERR3601956
442950	2017	180	2	Clade_Ia	neg	nanVarI	SPVarI	strVarII	Family2C3i1	g8	ERR3601804
444491	2017	180	4	Clade_II	neg	nanVarI	SPVarI	strVarI	Family2C3i1	g8	ERR3601848
446090	2017	1377	5	External	neg	nanVarII	SPVarI	strVarII	Family1C1v1	g9	ERR3601506
448272	2017	180	4	Clade_II	neg	nanVarIII	SPVarI	strVarII	Family2C5i1	g6	ERR3601692
449564	2017	180	1	Clade_Ia	neg	nanVarI	SPVarI	strVarII	Family2C3i1	g8	ERR3601819
450294	2017	6199	58	External	TETM	-	SPVarI	strVarI	Family1C2i4	g8	ERR3601790
451002	2017	233	10	External	neg	nanVarIII	SPVarI	strVarI	Family1C2v3	g11	ERR3601640
452394	2017	NOVEL allele. Closest ST:180(SLV)	1	Clade_Ia	neg	nanVarI	SPVarI	strVarII	Family2C3i2	g8	ERR3601669
452439	2017	180	3	Clade_II	TET	nanVarIII	SPVarI	strVarII	Family2C5i1	g6	ERR3601823
453886	2017	180	2	Clade_Ia	neg	nanVarI	SPVarI	strVarII	Family2C3i1	g8	ERR3601599
455429	2017	180	3	Clade_II	TET	nanVarIII	SPVarI	strVarII	Family2C5i1	g6	ERR3601606
455459	2017	180	2	Clade_Ia	neg	nanVarI	SPVarI	strVarI	Family2C3i1	g8	ERR3601759
456304	2017	180	3	Clade_II	TET	nanVarIII	SPVarI	strVarII	Family2C5i1	g6	ERR3601573
457426	2017	1377	5	External	neg	nanVarII	SPVarI	strVarI	Family1C1i2	g2	ERR3601751
458001	2017	180	4	Clade_II	neg	nanVarIII	SPVarI	strVarII	Family2C5i1	g6	ERR3601797
458529	2017	180	3	Clade_II	TET	nanVarIII	SPVarI	strVarII	Family2C5i1	g6	ERR3601993
460018	2017	1377	5	External	neg	nanVarII	SPVarI	strVarII	Family1C1v1	g9	ERR3601879
461402	2017	180	3	Clade_II	TET	nanVarIII	SPVarI	strVarII	Family2C5i1	g6	ERR3601575
462109	2017	180	3	Clade_II	TET	nanVarIII	SPVarI	strVarII	Family2C5i1	g6	ERR3602079
463635	2017	180	59	Clade_II	neg	nanVarIII	SPVarI	strVarII	Family2C5i1	g6	ERR3601735
464082	2017	180	3	Clade_II	TET	nanVarIII	SPVarI	strVarII	Family1C2i1	g6	ERR3601924
464101	2017	180	3	Clade_II	TET	nanVarI	SPVarI	strVarII	Family2C3i1	g6	ERR3601527
464136	2017	180	1	Clade_Ia	neg	nanVarI	SPVarI	strVarII	Family2C3i1	g8	ERR3601923
465335	2017	180	27	Clade_Ia	neg	nanVarI	SPVarI	strVarII	Family2C3i2	g8	ERR3601635
465355	2017	180	2	Clade_Ia	neg	nanVarI	SPVarI	strVarII	Family2C3i2	g8	ERR3602082
466186	2018	180	4	Clade_II	neg	nanVarIII	SPVarI	strVarII	Family2C5i1	g6	ERR3601829
466208	2018	180	4	Clade_II	neg	nanVarIII	SPVarI	strVarII	Family2C5i1	g6	ERR3601703
467563	2018	180	28	Clade_II	TET	nanVarIII	SPVarI	strVarII	Family2C5i1	g6	ERR3602047
468748	2018	180	4	Clade_II	neg	nanVarIII	SPVarI	strVarII	Family2C5i1	g6	ERR3602045
468957	2018	180	2	Clade_Ia	neg	nanVarI	SPVarI	strVarII	Family2C3i1	g8	ERR3601846
470386	2018	180	2	Clade_Ia	neg	nanVarI	SPVarI	strVarII	Family2C3i1	g8	ERR3601503
471067	2018	700	29	External	TETM	nanVarIII	SPVarI	strVarI	Family1C2i4	g5	ERR3601523
471111	2017	180	4	Clade_II	neg	nanVarIII	SPVarI	strVarI	Family2C5i1	g6	ERR3601873
473217	2018	1220	7	External	neg	nanVarII	SPVarI	strVarI	Family2C5i1	g6	ERR3601528
473234	2018	180	30	Clade_Ia	neg	nanVarI	SPVarI	strVarII	Family2C3i2	g8	ERR3601898
475279	2018	232	31	External	neg	nanVarII	SPVarI	strVarII	-	g11	ERR3601948
486499	2018	180	2	Clade_Ia	neg	nanVarI	SPVarI	strVarII	Family2C3i2	g8	ERR3601808
486671	2018	180	2	Clade_Ia	neg	nanVarI	SPVarI	strVarII	Family2C3i1	g8	ERR3601619
487985	2018	180	3	Clade_II	TET	nanVarIII	SPVarI	strVarII	Family2C5i1	g6	ERR3601798
491316	2018	180	4	Clade_II	neg	nanVarIII	SPVarI	strVarII	Family2C5i1	g6	ERR3601716
492666	2018	180	3	Clade_II	TET	nanVarIII	SPVarI	strVarII	Family2C5i1	g6	ERR3601864
494546	2018	180	1	Clade_Ia	neg	nanVarI	SPVarI	strVarII	Family2C3i1	g8	ERR3601944
495977	2018	180	3	Clade_II	TET	nanVarIII	SPVarI	strVarII	Family2C5i1	g6	ERR3601990
497280	2018	1377	5	External	neg	nanVarII	SPVarI	strVarII	Family1C1v1	g9	ERR3602039
498836	2018	180	2	Clade_Ia	neg	nanVarI	SPVarI	strVarII	Family2C3i1	g8	ERR3601786
504516	2018	180	6	Clade_II	neg	nanVarI	SPVarI	strVarI	Family1C1i3	g6	ERR3601519
505466	2018	NOVEL allele. Closest ST:180(SLV)	4	Clade_II	neg	nanVarIII	SPVarI	strVarII	Family2C5i1	g6	ERR3601522
506400	2018	180	1	Clade_Ia	neg	nanVarI	SPVarI	strVarI	Family2C3i1	g8	ERR3601572
507264	2018	180	6	Clade_II	neg	nanVarIII	SPVarI	strVarI	Family1C1i3	g6	ERR3602006
507268	2018	1377	5	External	neg	nanVarII	SPVarI	strVarII	Family1C1v1	g9	ERR3601777
507366	2018	180	3	Clade_II	TET	nanVarI	SPVarI	strVarII	Family2C5i1	g6	ERR3602048
509355	2018	180	32	Clade_Ia	neg	nanVarIII	SPVarI	strVarII	Family2C3i1	g8	ERR3601818
509376	2018	180	4	Clade_II	neg	nanVarIII	SPVarI	strVarI	Family2C5i1	g6	ERR3601683
513369	2018	180	3	Clade_II	TET	nanVarIII	SPVarI	strVarII	Family2C5i1	g6	ERR3601695
516200	2018	180	3	Clade_II	TET	nanVarIII	SPVarI	strVarII	Family2C5i1	g6	ERR3601524
517597	2018	505	12	Clade_Ib	neg	nanVarIII	SPVarII	strVarI	Family1C1i2	g11	ERR3601812
520161	2018	180	3	Clade_II	TET	nanVarIII	SPVarI	strVarI	Family2C5i1	g6	ERR3601994
523033	2018	180	3	Clade_II	TET	nanVarIII	SPVarI	strVarII	Family2C5i1	g6	ERR3601878
523811	2018	180	1	Clade_Ia	neg	nanVarI	SPVarI	strVarII	-	g8	ERR3601837
524360	2018	180	1	Clade_Ia	neg	nanVarI	SPVarI	strVarII	Family2C3i1	g8	ERR3601576
528063	2018	180	1	Clade_Ia	neg	nanVarI	SPVarI	strVarI	Family2C3i1	g8	ERR3601712
529201	2018	180	3	Clade_II	TET	nanVarIII	SPVarI	strVarII	Family2C5i1	g6	ERR3601516
534726	2018	180	1	Clade_Ia	neg	nanVarI	SPVarI	strVarII	Family2C3i1	g8	ERR3601639
538999	2018	180	3	Clade_II	TET	nanVarIII	SPVarI	strVarII	Family2C5i1	g6	ERR3601926
542023	2018	180	4	Clade_II	neg	nanVarIII	SPVarI	strVarII	Family2C5i1	g6	ERR3601866
546755	2018	180	3	Clade_II	TET	nanVarII	SPVarI	strVarII	Family2C5i1	g6	ERR3601778
548994	2018	180	14	Clade_II	TETM	nanVarIII	SPVarI	strVarI	Family1C1i3	g6	ERR3601845
550143	2018	180	3	Clade_II	TET	nanVarIII	SPVarI	strVarI	Family2C5i1	g6	ERR3601602
553816	2018	180	4	Clade_II	neg	nanVarIII	SPVarI	strVarII	Family2C5i1	g6	ERR3601520
560747	2018	180	2	Clade_Ia	neg	nanVarI	SPVarI	strVarII	Family2C3i2	g8	ERR3601554
569245	2018	180	4	Clade_II	neg	nanVarIII	SPVarI	strVarII	Family2C5i1	g6	ERR3601555
573171	2018	180	4	Clade_II	neg	nanVarIII	SPVarI	strVarI	Family2C5i1	g6	ERR3601901
577936	2018	180	1	Clade_Ia	neg	nanVarI	SPVarI	strVarI	Family2C3i1	g8	ERR3601779
591594	2018	180	4	Clade_II	neg	nanVarIII	SPVarI	strVarII	Family2C5i1	g6	ERR3601820
593463	2018	180	2	Clade_Ia	neg	nanVarI	SPVarI	strVarII	Family2C3i1	g8	ERR3601616
605825	2018	180	15	Clade_II	TETM	nanVarIII	SPVarI	strVarII	Family1C1i3	g6	ERR3601737
610018	2018	180	1	Clade_Ia	neg	nanVarI	SPVarI	strVarI	Family2C3i1	g8	ERR3602060
618360	2018	180	1	Clade_Ia	neg	nanVarI	SPVarI	strVarII	Family2C3v1	g8	ERR3602021
624289	2018	180	1	Clade_Ia	neg	nanVarI	SPVarI	strVarII	Family2C3i1	g8	ERR3601807
626681	2018	1377	5	External	neg	nanVarII	SPVarI	strVarII	Family1C1v1	g2	ERR3601887
632197	2018	180	2	Clade_Ia	neg	nanVarI	SPVarI	strVarII	Family2C3i1	g8	ERR3601589
634717	2018	180	1	Clade_Ia	neg	nanVarI	SPVarI	strVarI	Family2C3i1	g8	ERR3601630
636532	2018	180	2	Clade_Ia	neg	nanVarI	SPVarI	strVarI	Family2C3i2	g8	ERR3601781
646217	2018	180	3	Clade_II	TET	nanVarIII	SPVarI	strVarII	Family2C5i1	g6	ERR3601689
651006	2018	1377	5	External	neg	nanVarII	SPVarI	strVarII	Family1C1v1	g6	ERR3601949
651036	2018	180	3	Clade_II	TET	nanVarIII	SPVarI	strVarII	Family2C5i1	g6	ERR3530755
652775	2018	458	8	External	neg	-	SPVarI	strVarII	Family1C1v2	g8	ERR3601651
655393	2018	180	2	Clade_Ia	neg	nanVarI	SPVarI	strVarI	Family2C3i1	g8	ERR3601961
657343	2018	180	2	Clade_Ia	neg	nanVarI	SPVarI	strVarII	Family2C3i1	g8	ERR3601991
660040	2018	180	15	Clade_II	TETM	nanVarIII	SPVarI	strVarI	Family1C1i3	g6	ERR3601953
660143	2018	180	14	Clade_II	TETM	nanVarIII	SPVarI	strVarI	Family1C1i3	g6	ERR3602062
661961	2018	180	3	Clade_II	TET	nanVarIII	SPVarI	strVarII	Family2C5i1	g6	ERR3601631
665078	2018	180	4	Clade_II	neg	nanVarI	SPVarI	strVarII	Family2C5i1	g6	ERR3601992
695818	2010	180	2	Clade_Ia	neg	nanVarI	SPVarI	strVarII	Family2C3i2	g8	ERR3601674
695819	2010	180	2	Clade_Ia	neg	nanVarI	SPVarI	strVarII	Family2C3i1	g8	ERR3601614
695820	2010	180	2	Clade_Ia	neg	nanVarI	SPVarI	strVarII	Family2C3i1	g8	ERR3601863
695821	2010	180	2	Clade_Ia	neg	nanVarI	SPVarI	strVarII	Family2C3i1	g8	ERR3601969
695822	2010	180	2	Clade_Ia	neg	nanVarI	SPVarI	strVarII	Family2C3i1	g8	ERR3602056
695823	2010	180	1	Clade_Ia	neg	nanVarI	SPVarI	strVarI	Family2C3i1	g8	ERR3601652
695824	2010	180	11	Clade_Ia	neg	nanVarI	SPVarI	strVarII	Family2C3i1	g8	ERR3602046
695825	2010	180	1	Clade_Ia	neg	nanVarI	SPVarI	strVarI	Family2C3i1	g8	ERR3601579
695826	2010	180	2	Clade_Ia	neg	nanVarI	SPVarI	strVarII	Family2C3i2	g8	ERR3602020
695827	2010	180	1	Clade_Ia	neg	nanVarI	SPVarI	strVarI	Family2C3i1	g8	ERR3601543
695828	2010	180	1	Clade_Ia	neg	nanVarI	SPVarI	strVarI	Family2C3i1	g8	ERR3601672
695829	2010	180	1	Clade_Ia	neg	nanVarI	SPVarI	strVarII	Family2C3i2	g8	ERR3602040
695830	2010	458	33	External	TETM	-	SPVarI	strVarI	Family1C1v2	g8	ERR3601955
695831	2010	180	1	Clade_Ia	neg	nanVarI	SPVarI	strVarII	Family2C3i1	g8	ERR3601773
695833	2010	180	1	Clade_Ia	neg	nanVarI	SPVarI	strVarI	Family2C3i2	g8	ERR3601593
695835	2010	180	1	Clade_Ia	neg	nanVarI	SPVarI	strVarII	Family2C3i2	g8	ERR3602067
695837	2010	180	1	Clade_Ia	neg	nanVarI	SPVarI	strVarI	Family2C3i2	g8	ERR3601482
695839	2010	260	9	External	neg	nanVarII	SPVarI	strVarII	Family2C5i1	g6	ERR3601663
695841	2010	180	1	Clade_Ia	neg	nanVarI	SPVarI	strVarII	Family2C3i2	g8	ERR3601743
695844	2010	180	2	Clade_Ia	neg	nanVarI	SPVarI	strVarI	Family2C3i2	g8	ERR3601710
695846	2010	180	1	Clade_Ia	neg	nanVarI	SPVarI	strVarI	Family2C3i1	g8	ERR3601612
695848	2010	505	12	Clade_Ib	neg	nanVarIII	SPVarII	strVarI	Family1C1i2	g11	ERR3602041
695850	2010	180	1	Clade_Ia	neg	nanVarI	SPVarI	strVarII	Family2C3i2	g8	ERR3601727
695852	2010	180	2	Clade_Ia	neg	nanVarI	SPVarI	strVarII	Family2C3i2	g8	ERR3601963
695854	2010	180	2	Clade_Ia	neg	nanVarI	SPVarI	strVarII	Family2C3i1	g8	ERR3601815
695856	2010	180	2	Clade_Ia	neg	nanVarI	SPVarI	strVarII	Family2C3i2	g8	ERR3601872
695858	2010	260	9	External	neg	nanVarII	SPVarI	strVarI	Family2C5i1	g3	ERR3601908
695861	2010	260	9	External	neg	nanVarII	SPVarI	strVarI	Family2C5i1	g6	ERR3602043
695863	2010	458	8	External	neg	-	SPVarI	strVarII	Family2C3i1	g8	ERR3601761
695866	2010	180	1	Clade_Ia	neg	nanVarI	SPVarI	strVarII	Family2C3i1	g8	ERR3601559
695868	2011	180	1	Clade_Ia	neg	nanVarI	SPVarI	strVarII	Family2C3i1	g8	ERR3601920
695870	2011	1377	5	External	neg	nanVarII	SPVarI	strVarII	Family1C1v1	g6	ERR3601653
695872	2011	180	1	Clade_Ia	neg	nanVarI	SPVarI	strVarII	Family2C3i1	g8	ERR3601483
695874	2011	180	2	Clade_Ia	neg	nanVarI	SPVarI	strVarII	Family2C3i1	g8	ERR3601854
695876	2011	505	12	Clade_Ib	neg	nanVarIII	SPVarII	strVarI	Family1C1i2	g11	ERR3601730
695878	2011	233	10	External	neg	nanVarIII	SPVarI	strVarI	Family1C2v3	g11	ERR3601746
695880	2011	180	3	Clade_II	TET	nanVarIII	SPVarI	strVarII	Family2C5i1	g6	ERR3601925
695882	2011	180	1	Clade_Ia	neg	nanVarI	SPVarI	strVarII	Family2C3i1	g8	ERR3602076
695884	2011	1220	7	External	neg	nanVarII	SPVarI	strVarI	Family2C5i1	g6	ERR3601783
695886	2011	180	2	Clade_Ia	neg	nanVarI	SPVarI	strVarI	Family2C3i1	g8	ERR3601529
697417	2011	180	1	Clade_Ia	neg	nanVarI	SPVarI	strVarII	Family2C3i1	g8	ERR3601952
697421	2011	180	1	Clade_Ia	neg	nanVarI	SPVarI	strVarII	Family2C3i2	g8	ERR3601484
697423	2011	180	2	Clade_Ia	neg	nanVarI	SPVarI	strVarII	Family2C3i1	g8	ERR3601788
697425	2011	180	13	Clade_Ia	neg	nanVarI	SPVarI	strVarII	Family2C3i2	g8	ERR3602050
697427	2011	180	2	Clade_Ia	neg	nanVarI	SPVarI	strVarII	Family2C3i2	g8	ERR3601849
697429	2011	138	34	External	neg	nanVarIII	SPVarI	strVarI	Family1C2i2	g7	ERR3601801
697431	2011	180	2	Clade_Ia	neg	nanVarI	SPVarI	strVarII	Family2C3i2	g8	ERR3601657
697433	2011	180	3	Clade_II	TET	nanVarIII	SPVarI	strVarII	Family2C5i1	g6	ERR3601496
697435	2011	180	1	Clade_Ia	neg	nanVarI	SPVarI	strVarII	Family2C3i1	g8	ERR3601954
697437	2011	180	2	Clade_Ia	neg	nanVarI	SPVarI	strVarII	Family2C3i2	g8	ERR3601611
697439	2011	180	1	Clade_Ia	neg	nanVarI	SPVarI	strVarI	Family2C3i1	g8	ERR3601558
697441	2011	180	2	Clade_Ia	neg	nanVarI	SPVarI	strVarII	Family2C3i1	g8	ERR3602004
697443	2011	180	1	Clade_Ia	neg	nanVarI	SPVarI	strVarII	Family2C3i1	g8	ERR3601595
697445	2011	180	2	Clade_Ia	neg	nanVarI	SPVarI	strVarI	Family2C3i2	g8	ERR3601984
697447	2011	180	1	Clade_Ia	neg	nanVarI	SPVarII	strVarII	Family2C3i2	g8	ERR3601784
697449	2011	180	2	Clade_Ia	neg	nanVarI	SPVarI	strVarII	Family2C3i1	g8	ERR3601865
697451	2011	180	1	Clade_Ia	neg	nanVarI	SPVarI	strVarII	Family2C3i1	g8	ERR3601970
697453	2011	180	1	Clade_Ia	neg	nanVarI	SPVarI	strVarII	Family2C3i1	g8	ERR3601552
697455	2011	180	2	Clade_Ia	neg	nanVarI	SPVarI	strVarI	Family2C3i2	g8	ERR3601707
697457	2011	180	2	Clade_Ia	neg	nanVarI	SPVarI	strVarI	Family2C3i1	g8	ERR3601486
697459	2011	13720	1	Clade_Ia	neg	nanVarI	SPVarI	strVarII	Family2C3i1	g8	ERR3602028
697461	2011	260	9	External	neg	nanVarII	SPVarI	strVarI	Family2C5i1	g6	ERR3601644
697463	2011	180	1	Clade_Ia	neg	nanVarI	SPVarI	strVarII	Family2C3i1	g8	ERR3601512
697466	2011	260	9	External	neg	nanVarII	SPVarI	strVarI	Family2C5i1	g6	ERR3601532
697468	2011	180	2	Clade_Ia	neg	nanVarI	SPVarI	strVarII	Family2C3i1	g8	ERR3601738
697470	2011	180	2	Clade_Ia	neg	nanVarI	SPVarI	strVarII	Family2C3i1	g8	ERR3601673
697472	2011	180	1	Clade_Ia	neg	nanVarI	SPVarI	strVarII	Family2C3i1	g8	ERR3601648
697473	2012	180	2	Clade_Ia	neg	nanVarI	SPVarI	strVarII	Family2C3i1	g8	ERR3601514
697475	2012	180	3	Clade_II	TET	nanVarI	SPVarI	strVarII	Family2C5i1	g6	ERR3601662
697477	2012	180	11	Clade_Ia	neg	nanVarI	SPVarI	strVarII	Family2C3i1	g8	ERR3601725
697480	2012	180	1	Clade_Ia	neg	nanVarI	SPVarI	strVarII	Family2C3i1	g8	ERR3601844
697481	2012	180	2	Clade_Ia	neg	nanVarI	SPVarI	strVarII	Family2C3i1	g8	ERR3601978
697484	2012	180	1	Clade_Ia	neg	nanVarI	SPVarI	strVarII	Family2C3i2	g8	ERR3601708
697486	2012	180	1	Clade_Ia	neg	nanVarI	SPVarI	strVarI	Family2C3i1	g8	ERR3601882
697487	2012	180	2	Clade_Ia	neg	nanVarI	SPVarI	strVarII	Family2C3i1	g8	ERR3601971
697490	2012	180	1	Clade_Ia	neg	nanVarI	SPVarI	strVarII	Family2C3i1	g8	ERR3601719
697491	2012	180	1	Clade_Ia	neg	nanVarI	SPVarI	strVarI	Family2C3i1	g8	ERR3601859
697494	2012	180	1	Clade_Ia	neg	nanVarI	SPVarI	strVarII	Family2C3i1	g8	ERR3601562
697729	2011	62	35	External	neg	nanVarIII	SPVarI	strVarII	Family2C3v1	g6	ERR3601699
697730	2012	180	3	Clade_II	TET	nanVarIII	SPVarI	strVarI	Family2C5i1	g6	ERR3601654
697731	2012	180	13	Clade_Ia	neg	nanVarI	SPVarI	strVarII	Family2C3i2	g8	ERR3601515
697732	2012	180	2	Clade_Ia	neg	nanVarI	SPVarI	strVarII	Family2C3i2	g8	ERR3601569
697733	2012	180	2	Clade_Ia	neg	nanVarI	SPVarI	strVarII	Family2C3i2	g8	ERR3601740
697734	2012	1377	5	External	neg	nanVarII	SPVarI	strVarII	Family1C1v1	g6	ERR3602019
697869	2014	180	1	Clade_Ia	neg	nanVarI	SPVarI	strVarII	Family2C3i2	g8	ERR3601946
697870	2014	180	3	Clade_II	TET	nanVarIII	SPVarI	strVarII	Family2C5i1	g6	ERR3601966
697871	2014	180	1	Clade_Ia	neg	nanVarI	SPVarI	strVarII	Family2C3i1	g8	ERR3601890
697872	2014	180	1	Clade_Ia	neg	nanVarI	SPVarI	strVarII	Family2C3i1	g8	ERR3602071
697873	2014	3848	1	Clade_Ia	neg	nanVarI	SPVarI	strVarII	Family2C3i2	g8	ERR3601526
697874	2014	180	1	Clade_Ia	neg	nanVarI	SPVarI	strVarII	Family2C3i1	g8	ERR3601881
697875	2014	180	1	Clade_Ia	neg	nanVarI	SPVarI	strVarII	Family2C3i1	g8	ERR3601985
697876	2014	180	1	Clade_Ia	neg	nanVarI	SPVarI	strVarII	Family2C3i1	g8	ERR3601736
697877	2014	180	2	Clade_Ia	neg	nanVarI	SPVarI	strVarI	Family2C3i1	g8	ERR3601551
697878	2014	180	2	Clade_Ia	neg	nanVarI	SPVarI	strVarII	Family2C3i2	g8	ERR3602057
697879	2014	180	2	Clade_Ia	neg	nanVarI	SPVarI	strVarII	Family2C3i1	g8	ERR3601929
697880	2014	180	2	Clade_Ia	neg	nanVarI	SPVarI	strVarII	Family2C3i1	g8	ERR3601686
697881	2014	180	1	Clade_Ia	neg	nanVarI	SPVarI	strVarII	Family2C3i1	g8	ERR3601841
697882	2014	180	3	Clade_II	TET	nanVarIII	SPVarI	strVarII	Family2C5i1	g6	ERR3601536
697883	2014	180	1	Clade_Ia	neg	nanVarI	SPVarI	strVarII	Family2C3i1	g8	ERR3601682
697884	2014	180	4	Clade_II	neg	nanVarIII	SPVarI	strVarII	Family2C5i1	g6	ERR3601857
697885	2014	180	4	Clade_II	neg	nanVarIII	SPVarI	strVarII	Family2C5i1	g6	ERR3601678
697886	2014	180	1	Clade_Ia	neg	nanVarI	SPVarI	strVarII	Family2C3i1	g8	ERR3602063
697887	2014	180	1	Clade_Ia	neg	nanVarI	SPVarI	strVarII	Family2C3i1	g8	ERR3601537
697888	2015	1220	7	External	neg	nanVarII	SPVarI	strVarI	Family2C5v1	g6	ERR3601684
697889	2015	180	2	Clade_Ia	neg	nanVarI	SPVarI	strVarII	Family2C3i1	g8	ERR3601608
697890	2015	1377	5	External	neg	nanVarII	SPVarI	strVarII	Family1C1v1	g9	ERR3601800
697891	2015	180	1	Clade_Ia	neg	nanVarI	SPVarI	strVarII	Family2C3i2	g8	ERR3601906
697893	2015	180	1	Clade_Ia	neg	nanVarI	SPVarI	strVarII	Family2C3i1	g8	ERR3601502
697917	2012	180	1	Clade_Ia	neg	nanVarI	SPVarI	strVarII	Family2C3i2	g8	ERR3601492
697919	2012	180	11	Clade_Ia	neg	nanVarI	SPVarI	strVarI	Family2C3i2	g8	ERR3601795
697921	2012	180	2	Clade_Ia	neg	nanVarI	SPVarI	strVarII	Family2C3i1	g8	ERR3601932
697923	2012	1377	5	External	neg	nanVarII	SPVarI	strVarII	Family1C1v1	g2	ERR3602059
697925	2012	1377	5	External	neg	nanVarII	SPVarI	strVarII	Family1C1v1	g2	ERR3601723
697927	2012	180	1	Clade_Ia	neg	nanVarI	SPVarI	strVarII	Family2C3i2	g8	ERR3601753
697929	2012	180	1	Clade_Ia	neg	nanVarI	SPVarI	strVarII	Family2C3i1	g8	ERR3601941
697931	2012	180	2	Clade_Ia	neg	nanVarI	SPVarI	strVarI	Family2C3i1	g8	ERR3602010
697933	2012	180	2	Clade_Ia	neg	nanVarI	SPVarI	strVarII	Family2C3i1	g8	ERR3601547
697935	2012	180	2	Clade_Ia	neg	nanVarI	SPVarI	strVarI	Family2C3i1	g8	ERR3601840
697937	2012	180	2	Clade_Ia	neg	nanVarI	SPVarI	strVarII	Family2C3i1	g8	ERR3601641
697939	2012	180	1	Clade_Ia	neg	nanVarI	SPVarI	strVarI	Family2C3i1	g8	ERR3601586
697941	2012	180	1	Clade_Ia	neg	nanVarI	SPVarI	strVarI	Family2C3i2	g8	ERR3601764
697943	2013	180	2	Clade_Ia	neg	nanVarI	SPVarI	strVarII	Family2C3i1	g8	ERR3601660
697945	2013	1220	7	External	neg	nanVarII	SPVarI	strVarI	Family2C5i1	g6	ERR3601945
697947	2013	260	9	External	neg	nanVarII	SPVarI	strVarI	Family2C5i1	g6	ERR3602015
697949	2013	180	1	Clade_Ia	neg	nanVarI	SPVarI	strVarII	Family2C3i1	g8	ERR3601646
697951	2013	180	1	Clade_Ia	neg	nanVarI	SPVarI	strVarI	Family2C3i1	g8	ERR3601603
697953	2013	180	1	Clade_Ia	neg	nanVarI	SPVarI	strVarII	Family2C3i1	g8	ERR3601922
697955	2013	180	13	Clade_Ia	neg	nanVarI	SPVarI	strVarII	Family2C3i1	g8	ERR3601588
697957	2013	180	2	Clade_Ia	neg	nanVarI	SPVarI	strVarII	Family2C3i1	g8	ERR3601609
697959	2013	180	4	Clade_II	neg	nanVarI	SPVarI	strVarII	-	g8	ERR3601891
697961	2013	180	11	Clade_Ia	neg	nanVarI	SPVarI	strVarII	Family2C3i2	g8	ERR3601982
697963	2013	271	21	External	TETM	nanVarIII	SPVarI	strVarI	Family2C3i1	g6	ERR3601713
697965	2013	505	36	Clade_Ib	neg	nanVarIII	SPVarII	strVarI	Family1C1i2	g11	ERR3602075
697969	2013	180	2	Clade_Ia	neg	nanVarI	SPVarI	strVarII	Family2C3i1	g8	ERR3601851
697971	2013	180	2	Clade_Ia	neg	nanVarI	SPVarI	strVarII	Family2C3i1	g8	ERR3601739
697973	2013	233	10	External	neg	nanVarIII	SPVarI	strVarI	Family1C2v3	g11	ERR3602074
697975	2013	180	2	Clade_Ia	neg	nanVarI	SPVarI	strVarII	Family2C3i1	g8	ERR3601649
697977	2013	180	1	Clade_Ia	neg	nanVarI	SPVarI	strVarII	Family2C3i1	g8	ERR3601587
697979	2013	180	2	Clade_Ia	neg	nanVarI	SPVarI	strVarI	Family2C3i2	g8	ERR3601724
697981	2013	180	2	Clade_Ia	neg	nanVarI	SPVarI	strVarII	Family2C3i1	g8	ERR3601518
697983	2013	180	1	Clade_Ia	neg	nanVarI	SPVarI	strVarII	Family2C3i1	g8	ERR3601855
697985	2013	180	2	Clade_Ia	neg	nanVarI	SPVarI	strVarI	Family2C3i1	g8	ERR3601943
697987	2013	180	1	Clade_Ia	neg	nanVarI	SPVarI	strVarI	Family2C3i1	g8	ERR3601950
697989	2013	180	4	Clade_II	neg	nanVarIII	SPVarI	strVarII	Family2C5i1	g6	ERR3601487
697990	2013	180	1	Clade_Ia	neg	nanVarI	SPVarI	strVarII	Family2C3i1	g8	ERR3601636
697991	2013	180	4	Clade_II	neg	nanVarIII	SPVarI	strVarII	Family2C5i1	g6	ERR3602024
697992	2013	505	12	Clade_Ib	neg	nanVarIII	SPVarII	strVarI	Family1C1i2	g8	ERR3601787
697993	2014	180	2	Clade_Ia	neg	nanVarI	SPVarI	strVarII	Family2C3i2	g8	ERR3601598
697995	2014	180	1	Clade_Ia	neg	nanVarI	SPVarI	strVarII	Family2C3i1	g8	ERR3601871
697996	2014	180	1	Clade_Ia	neg	nanVarI	SPVarI	strVarI	Family2C3i1	g8	ERR3601916
697997	2014	180	1	Clade_Ia	neg	nanVarI	SPVarI	strVarII	Family2C3i1	g8	ERR3601664
697998	2014	180	1	Clade_Ia	neg	nanVarI	SPVarI	strVarII	Family2C3i1	g8	ERR3601718
699723	2014	180	1	Clade_Ia	neg	nanVarI	SPVarI	strVarI	Family2C3i1	g8	ERR3601897
699725	2015	180	4	Clade_II	neg	nanVarI	SPVarI	strVarII	Family2C5i1	g6	ERR3601940
699727	2015	180	13	Clade_Ia	neg	nanVarI	SPVarI	strVarI	Family2C3i1	g8	ERR3602036
699729	2015	180	2	Clade_Ia	neg	nanVarI	SPVarI	strVarI	#NAME?	g8	ERR3601973
699731	2015	180	1	Clade_Ia	neg	nanVarI	SPVarI	strVarII	Family2C3i1	g8	ERR3601942
699733	2015	180	1	Clade_Ia	neg	nanVarI	SPVarI	strVarII	Family2C3i1	g8	ERR3601499
699735	2015	180	2	Clade_Ia	neg	nanVarI	SPVarI	strVarII	Family2C3i2	g8	ERR3601902
699738	2015	180	1	Clade_Ia	neg	nanVarI	SPVarI	strVarII	Family2C3i1	g8	ERR3601513
699739	2015	180	2	Clade_Ia	neg	nanVarI	SPVarI	strVarII	Family2C3i1	g8	ERR3601867
699741	2015	180	3	Clade_II	TET	nanVarIII	SPVarI	strVarII	Family2C5i1	g6	ERR3602044
699743	2015	180	2	Clade_Ia	neg	nanVarI	SPVarI	strVarII	Family2C3i1	g8	ERR3602005
699745	2015	1220	7	External	neg	nanVarII	SPVarII	strVarI	Family2C5i1	g6	ERR3601705
699747	2015	180	6	Clade_II	neg	nanVarIII	SPVarI	strVarII	Family1C1i3	g6	ERR3601650
699749	2015	180	1	Clade_Ia	neg	nanVarI	SPVarI	strVarII	Family2C3i1	g8	ERR3601494
699751	2015	180	2	Clade_Ia	neg	nanVarI	SPVarI	strVarI	Family2C3i1	g8	ERR3601507
699753	2015	180	2	Clade_Ia	neg	nanVarI	SPVarI	strVarII	Family2C3i1	g8	ERR3601538
699756	2015	180	1	Clade_Ia	neg	nanVarI	SPVarI	strVarII	Family2C3i1	g8	ERR3601637
699758	2015	180	2	Clade_Ia	neg	nanVarI	SPVarI	strVarII	Family2C3i1	g8	ERR3601757
699760	2015	180	2	Clade_Ia	neg	nanVarI	SPVarI	strVarII	Family2C3i1	g8	ERR3601770
699762	2015	180	2	Clade_Ia	neg	nanVarI	SPVarI	strVarII	Family2C3i1	g8	ERR3601893
699763	2015	180	3	Clade_II	TET	nanVarIII	SPVarI	strVarI	Family2C5i1	g6	ERR3601780
699765	2015	180	14	Clade_II	TETM	nanVarIII	SPVarI	strVarII	Family1C1i3	g6	ERR3601911
699768	2015	180	1	Clade_Ia	neg	nanVarI	SPVarI	strVarII	Family2C3i1	g8	ERR3601789
699770	2015	180	4	Clade_II	neg	nanVarIII	SPVarI	strVarII	Family2C5i1	g6	ERR3601938
699773	2015	180	3	Clade_II	TET	nanVarIII	SPVarI	strVarII	Family2C5i1	g6	ERR3601939
699776	2015	180	2	Clade_Ia	neg	nanVarI	SPVarI	strVarI	Family2C3i1	g8	ERR3601934
699777	2015	180	2	Clade_Ia	neg	nanVarI	SPVarI	strVarI	Family2C3i2	g8	ERR3602033
699780	2015	180	3	Clade_II	TET	nanVarI	SPVarI	strVarI	Family2C5i1	g6	ERR3601769
699782	2015	180	1	Clade_Ia	neg	nanVarI	SPVarI	strVarII	Family2C3i2	g8	ERR3601493
699783	2016	180	4	Clade_II	neg	nanVarIII	SPVarI	strVarII	Family2C5i1	g6	ERR3601927
699786	2016	180	1	Clade_Ia	neg	nanVarI	SPVarI	strVarI	Family2C3i1	g8	ERR3601668
699788	2016	180	4	Clade_II	neg	nanVarI	SPVarI	strVarII	Family2C5i1	g6	ERR3601782
699789	2016	180	2	Clade_Ia	neg	nanVarI	SPVarI	strVarII	Family2C3i2	g8	ERR3601600
699791	2016	180	2	Clade_Ia	neg	nanVarI	SPVarI	strVarI	Family2C3i1	g8	ERR3601889
699793	2016	1377	5	External	neg	nanVarIII	SPVarI	strVarII	Family1C1i2	g9	ERR3601604
699795	2016	180	3	Clade_II	TET	nanVarIII	SPVarI	strVarI	Family2C5i1	g6	ERR3601931
699798	2016	180	1	Clade_Ia	neg	nanVarI	SPVarI	strVarII	Family2C3i1	g8	ERR3601656
699799	2016	180	2	Clade_Ia	neg	nanVarI	SPVarI	strVarII	Family2C3i1	g8	ERR3601633
699801	2016	1377	5	External	neg	nanVarII	SPVarI	strVarII	Family1C1v1	g6	ERR3601886
699803	2016	180	4	Clade_II	neg	nanVarIII	SPVarI	strVarII	Family2C5i1	g6	ERR3601601
699805	2016	180	2	Clade_Ia	neg	nanVarI	SPVarI	strVarI	Family2C3i1	g8	ERR3601581
699808	2016	NOVEL allele. Closest ST:1377(SLV)	5	External	neg	nanVarII	SPVarI	strVarII	Family1C1v1	g6	ERR3601670
699809	2016	180	4	Clade_II	neg	nanVarIII	SPVarI	strVarI	Family2C5i1	g2	ERR3601676
699811	2016	180	1	Clade_Ia	neg	nanVarI	SPVarI	strVarII	Family2C3i1	g8	ERR3601909
699812	2016	180	37	Clade_Ia	neg	nanVarI	SPVarI	strVarII	Family2C3i1	g8	ERR3602077
699813	2016	180	4	Clade_II	neg	nanVarIII	SPVarI	strVarII	Family2C5i1	g6	ERR3602027
699814	2016	180	3	Clade_II	TET	nanVarIII	SPVarI	strVarII	Family2C5i1	g6	ERR3601765
699815	2016	180	3	Clade_II	TET	nanVarIII	SPVarI	strVarII	Family2C5i1	g6	ERR3601910
699816	2016	1377	5	External	neg	nanVarII	SPVarI	strVarII	Family1C1v1	g6	ERR3601495
699817	2016	180	2	Clade_Ia	neg	nanVarI	SPVarI	strVarII	Family2C3i1	g8	ERR3602016
699819	2016	180	1	Clade_Ia	neg	nanVarI	SPVarI	strVarII	Family2C3i1	g8	ERR3601905
699820	2016	1220	7	External	neg	nanVarII	SPVarI	strVarI	Family2C5i1	g6	ERR3602000
699821	2016	180	3	Clade_II	TET	nanVarIII	SPVarI	strVarII	Family2C5i1	g2	ERR3602009
699822	2016	180	3	Clade_II	TET	nanVarIII	SPVarI	strVarII	Family2C5i1	g6	ERR3601509
699823	2016	180	3	Clade_II	TET	nanVarIII	SPVarI	strVarI	Family2C5i1	g6	ERR3601913
699824	2016	180	2	Clade_Ia	neg	nanVarI	SPVarI	strVarII	Family2C3i1	g8	ERR3601553
699825	2016	1377	5	External	neg	nanVarII	SPVarI	strVarII	Family1C1v1	g9	ERR3601959
699826	2016	1377	5	External	neg	nanVarII	SPVarI	strVarII	Family1C1v3	g2	ERR3601491
699827	2016	180	4	Clade_II	neg	nanVarIII	SPVarI	strVarI	Family2C5i1	g6	ERR3601754
699828	2016	180	2	Clade_Ia	neg	nanVarI	SPVarI	strVarII	Family2C3i2	g8	ERR3601567
699829	2016	180	1	Clade_Ia	neg	nanVarI	SPVarI	strVarII	Family2C3i1	g8	ERR3601977
699830	2016	180	3	Clade_II	TET	nanVarIII	SPVarI	strVarII	Family2C5i1	g6	ERR3601617
699831	2016	180	1	Clade_Ia	neg	nanVarI	SPVarI	strVarII	Family2C3i1	g8	ERR3601498
699832	2016	180	2	Clade_Ia	neg	nanVarI	SPVarI	strVarII	Family2C3i1	g8	ERR3601698
699833	2016	180	4	Clade_II	neg	nanVarIII	SPVarI	strVarII	Family2C5i1	g6	ERR3601869
699834	2016	180	2	Clade_Ia	neg	nanVarI	SPVarI	strVarI	Family2C3i1	g8	ERR3602042
699835	2016	233	10	External	neg	nanVarIII	SPVarI	strVarI	Family1C2v3	g11	ERR3602073
699836	2016	180	3	Clade_II	TET	nanVarIII	SPVarI	strVarI	Family2C5i1	g6	ERR3601980
699837	2016	180	2	Clade_Ia	neg	nanVarI	SPVarI	strVarII	Family2C3i1	g8	ERR3601968
699838	2016	180	1	Clade_Ia	neg	nanVarI	SPVarI	strVarII	Family2C3i1	g8	ERR3601989
699839	2016	180	4	Clade_II	neg	nanVarIII	SPVarI	strVarII	Family2C5i1	g6	ERR3601918
699840	2016	180	4	Clade_II	neg	nanVarIII	SPVarI	strVarII	Family2C5i1	g6	ERR3601810
699841	2016	180	1	Clade_Ia	neg	nanVarI	SPVarI	strVarI	Family2C3i1	g8	ERR3601858
699842	2016	180	4	Clade_II	neg	nanVarIII	SPVarI	strVarI	Family2C5i1	g6	ERR3601828
699843	2016	180	2	Clade_Ia	neg	nanVarI	SPVarI	strVarII	Family2C3i1	g8	ERR3601489
701576	2008	180	1	Clade_Ia	neg	nanVarI	SPVarI	strVarI	Family2C3i1	g8	ERR3601979
701577	2008	180	1	Clade_Ia	neg	nanVarI	SPVarI	strVarI	Family2C3i2	g8	ERR3601693
701578	2008	180	1	Clade_Ia	neg	nanVarI	SPVarI	strVarII	Family2C3i2	g8	ERR3601659
701579	2008	1220	7	External	neg	nanVarII	SPVarI	strVarII	Family2C5i1	g3	ERR3601745
701580	2008	180	1	Clade_Ia	neg	nanVarI	SPVarI	strVarI	Family2C3i1	g8	ERR3602012
701581	2008	180	1	Clade_Ia	neg	nanVarI	SPVarI	strVarII	Family2C3i2	g8	ERR3601550
701582	2008	NOVEL allele. Closest ST:1377(SLV)	5	External	neg	nanVarII	SPVarI	strVarII	Family1C1v1	g9	ERR3601974
701583	2008	180	1	Clade_Ia	neg	nanVarI	SPVarI	strVarII	Family2C3i1	g8	ERR3601998
701584	2008	180	1	Clade_Ia	neg	nanVarI	SPVarI	strVarII	Family2C3i1	g8	ERR3601533
701585	2008	180	1	Clade_Ia	neg	nanVarI	SPVarI	strVarII	Family2C3i2	g8	ERR3601661
701586	2008	180	1	Clade_Ia	neg	nanVarI	SPVarI	strVarII	Family2C3i2	g8	ERR3601752
701587	2008	180	1	Clade_Ia	neg	nanVarI	SPVarI	strVarII	Family2C3i1	g8	ERR3601490
701588	2008	180	4	Clade_II	neg	nanVarIII	SPVarI	strVarII	Family2C5i1	g6	ERR3601853
701589	2008	180	2	Clade_Ia	neg	nanVarI	SPVarI	strVarII	Family2C3i1	g8	ERR3601556
701590	2008	180	13	Clade_Ia	neg	nanVarI	SPVarI	strVarII	Family2C3i1	g8	ERR3601565
701591	2008	180	2	Clade_Ia	neg	nanVarI	SPVarI	strVarII	Family2C3i2	g8	ERR3601585
701592	2008	180	1	Clade_Ia	neg	nanVarI	SPVarI	strVarI	Family2C3i1	g8	ERR3602055
701593	2008	180	1	Clade_Ia	neg	nanVarI	SPVarI	strVarII	Family2C3i1	g8	ERR3601767
701594	2008	180	2	Clade_Ia	neg	nanVarI	SPVarI	strVarII	Family2C3i1	g8	ERR3601825
701595	2008	180	2	Clade_Ia	neg	nanVarI	SPVarI	strVarII	Family2C3i1	g8	ERR3601817
701596	2008	180	2	Clade_Ia	neg	nanVarI	SPVarI	strVarII	Family2C3i1	g8	ERR3601809
701597	2008	180	3	Clade_II	TET	nanVarIII	SPVarI	strVarII	Family2C5i1	g6	ERR3602023
701598	2008	180	1	Clade_Ia	neg	nanVarI	SPVarI	strVarI	Family2C3i2	g8	ERR3601839
701599	2009	180	1	Clade_Ia	neg	nanVarI	SPVarI	strVarII	Family2C3i1	g8	ERR3602030
701600	2009	180	2	Clade_Ia	neg	nanVarI	SPVarI	strVarII	Family2C3i2	g8	ERR3601685
701601	2009	180	2	Clade_Ia	neg	nanVarI	SPVarI	strVarI	Family2C3i2	g8	ERR3601694
701602	2009	180	1	Clade_Ia	neg	nanVarI	SPVarI	strVarII	Family2C3i1	g8	ERR3601758
701603	2009	180	1	Clade_Ia	neg	nanVarI	SPVarI	strVarII	Family2C3i1	g8	ERR3601900
701604	2009	260	9	External	neg	nanVarII	SPVarII	strVarI	Family2C5i1	g6	ERR3601690
701605	2003	233	10	External	neg	nanVarIII	SPVarI	strVarI	Family1C2v3	g11	ERR3601610
701606	2009	180	6	Clade_II	neg	nanVarIII	SPVarI	strVarII	Family1C1i3	g6	ERR3601903
701607	2003	180	1	Clade_Ia	neg	nanVarI	SPVarI	strVarII	Family2C3i1	g8	ERR3601876
701608	2009	180	1	Clade_Ia	neg	nanVarI	SPVarI	strVarII	Family2C3i1	g8	ERR3601951
701609	2003	180	1	Clade_Ia	neg	nanVarI	SPVarI	strVarII	Family2C3i1	g8	ERR3601688
701610	2009	180	1	Clade_Ia	neg	nanVarI	SPVarI	strVarII	Family2C3i1	g8	ERR3601822
701611	2003	180	1	Clade_Ia	neg	nanVarI	SPVarI	strVarII	Family2C3i1	g8	ERR3601564
701613	2003	180	1	Clade_Ia	neg	nanVarI	SPVarI	strVarI	Family2C3i1	g8	ERR3601549
701614	2009	180	1	Clade_Ia	neg	nanVarI	SPVarI	strVarII	Family2C3i2	g8	ERR3601836
701615	2003	180	1	Clade_Ia	neg	nanVarI	SPVarI	strVarII	Family2C3i1	g8	ERR3601500
701616	2009	180	38	Clade_Ia	neg	nanVarI	SPVarI	strVarII	Family2C3i1	g8	ERR3601666
701617	2003	180	1	Clade_Ia	neg	nanVarI	SPVarI	strVarII	Family2C3i1	g8	ERR3601546
701618	2009	180	2	Clade_Ia	neg	nanVarI	SPVarI	strVarI	Family2C3i1	g8	ERR3601915
701619	2003	180	1	Clade_Ia	neg	nanVarI	SPVarI	strVarII	Family2C3i1	g8	ERR3601914
701620	2009	180	1	Clade_Ia	neg	nanVarI	SPVarI	strVarII	Family2C3i1	g8	ERR3601580
701622	2009	180	1	Clade_Ia	neg	nanVarI	SPVarI	strVarII	Family2C3i1	g8	ERR3601880
701623	2003	180	2	Clade_Ia	neg	nanVarI	SPVarI	strVarII	Family2C3i1	g8	ERR3601563
701624	2009	260	9	External	neg	nanVarII	SPVarI	strVarI	Family2C5i1	g3	ERR3601912
701625	2003	180	1	Clade_Ia	neg	nanVarI	SPVarI	strVarII	Family2C3i1	g8	ERR3601691
701626	2009	260	9	External	neg	nanVarII	SPVarI	strVarI	Family2C5i1	g6	ERR3601714
701627	2003	458	8	External	neg	-	SPVarI	strVarI	Family1C1v2	g8	ERR3601806
701628	2009	NOVEL allele. Closest ST:271(SLV)	21	External	TETM	nanVarIII	SPVarI	strVarI	Family1C1i2	g9	ERR3601625
701629	2003	180	1	Clade_Ia	neg	nanVarI	SPVarI	strVarII	Family2C3i2	g8	ERR3601760
701630	2009	180	2	Clade_Ia	neg	nanVarI	SPVarI	strVarII	Family2C3i2	g8	ERR3601541
701631	2003	180	1	Clade_Ia	neg	nanVarI	SPVarI	strVarII	Family2C3i2	g8	ERR3601679
701632	2009	180	1	Clade_Ia	neg	nanVarI	SPVarI	strVarII	Family2C3i1	g8	ERR3602078
701633	2003	180	1	Clade_Ia	neg	nanVarI	SPVarI	strVarII	Family2C3i1	g8	ERR3601811
701634	2009	180	39	Clade_Ia	neg	nanVarI	SPVarI	strVarII	Family2C3i1	g8	ERR3602070
701635	2003	1220	7	External	neg	nanVarII	SPVarI	strVarI	Family2C5i1	g6	ERR3601577
701636	2009	180	2	Clade_Ia	neg	nanVarI	SPVarI	strVarI	Family2C3i2	g8	ERR3601618
701637	2003	180	1	Clade_Ia	neg	nanVarI	SPVarI	strVarII	Family2C3i1	g8	ERR3602013
701638	2009	180	2	Clade_Ia	neg	nanVarI	SPVarI	strVarII	Family2C3i2	g8	ERR3601696
701639	2003	NOVEL allele. Closest ST:180(SLV)	1	Clade_Ia	neg	nanVarI	SPVarI	strVarII	Family2C3i1	g8	ERR3601803
701640	2009	180	1	Clade_Ia	neg	nanVarI	SPVarI	strVarI	Family2C3i1	g8	ERR3601638
701641	2003	180	1	Clade_Ia	neg	nanVarI	SPVarI	strVarII	Family2C3i2	g8	ERR3601793
701642	2009	180	1	Clade_Ia	neg	nanVarI	SPVarI	strVarII	Family2C3i1	g8	ERR3601976
701643	2003	180	1	Clade_Ia	neg	nanVarI	SPVarI	strVarII	Family2C3i1	g8	ERR3601771
701644	2009	180	1	Clade_Ia	neg	nanVarI	SPVarI	strVarII	Family2C3i2	g8	ERR3601892
701645	2003	180	1	Clade_Ia	neg	nanVarI	SPVarI	strVarI	Family2C3i1	g8	ERR3601597
701646	2009	180	1	Clade_Ia	neg	nanVarI	SPVarI	strVarII	Family2C3i1	g8	ERR3601850
701647	2003	180	2	Clade_Ia	neg	nanVarI	SPVarI	strVarI	Family2C3i1	g8	ERR3601574
701648	2009	180	2	Clade_Ia	neg	nanVarI	SPVarI	strVarI	Family2C3i1	g8	ERR3601525
701649	2003	180	1	Clade_Ia	neg	nanVarI	SPVarI	strVarII	Family2C3i1	g8	ERR3601972
701650	2009	1377	5	External	neg	nanVarII	SPVarI	strVarII	Family1C1v1	g9	ERR3601883
701652	2009	180	2	Clade_Ia	neg	nanVarI	SPVarI	strVarII	Family2C3i2	g8	ERR3601792
701654	2009	13815	8	External	neg	-	SPVarI	strVarI	Family1C1v2	g8	ERR3601621
701655	2003	180	2	Clade_Ia	neg	nanVarI	SPVarI	strVarII	Family2C3i1	g8	ERR3602038
701656	2009	180	1	Clade_Ia	neg	nanVarI	SPVarI	strVarI	Family2C3i2	g8	ERR3601899
701657	2003	180	1	Clade_Ia	neg	nanVarI	SPVarI	strVarII	Family2C3i1	g8	ERR3601843
701658	2009	180	2	Clade_Ia	neg	nanVarI	SPVarI	strVarII	Family2C3i1	g8	ERR3602003
701659	2003	180	1	Clade_Ia	neg	nanVarI	SPVarI	strVarII	Family2C3i1	g8	ERR3601702
701661	2003	180	1	Clade_Ia	neg	nanVarI	SPVarI	strVarII	Family2C3i1	g8	ERR3601700
701662	2009	180	2	Clade_Ia	neg	nanVarI	SPVarI	strVarII	Family2C3i2	g8	ERR3602002
701663	2003	180	1	Clade_Ia	neg	nanVarI	SPVarI	strVarII	Family2C3i1	g8	ERR3601962
701664	2009	180	1	Clade_Ia	neg	nanVarI	SPVarI	strVarII	Family2C3i1	g8	ERR3601561
701665	2003	180	1	Clade_Ia	neg	nanVarI	SPVarI	strVarI	Family2C3i2	g8	ERR3601824
701666	2009	180	2	Clade_Ia	neg	nanVarI	SPVarI	strVarII	Family2C3i1	g8	ERR3601488
701667	2003	180	1	Clade_Ia	neg	nanVarI	SPVarI	strVarII	Family2C3i2	g8	ERR3602061
701668	2009	180	16	Clade_Ib	neg	nanVarI	SPVarII	strVarII	Family2C3i2	g6	ERR3602053
701669	2003	180	1	Clade_Ia	neg	nanVarI	SPVarI	strVarII	Family2C3i1	g8	ERR3601534
701670	2009	180	1	Clade_Ia	neg	nanVarI	SPVarI	strVarII	Family2C3i2	g8	ERR3601568
701671	2003	232	22	External	neg	nanVarII	SPVarI	strVarII	Family2C5i1	g11	ERR3601975
701672	2009	180	2	Clade_Ia	neg	nanVarI	SPVarI	strVarII	Family2C3i2	g8	ERR3601701
701673	2003	180	2	Clade_Ia	neg	nanVarI	SPVarI	strVarI	Family2C3i2	g8	ERR3601995
701674	2009	180	1	Clade_Ia	neg	nanVarI	SPVarI	strVarII	Family2C3i1	g8	ERR3601510
701675	2003	1220	7	External	neg	nanVarII	SPVarI	strVarI	Family2C5i1	g6	ERR3601888
701678	2009	180	2	Clade_Ia	neg	nanVarI	SPVarI	strVarII	Family2C3i1	g8	ERR3601749
701679	2003	180	1	Clade_Ia	neg	nanVarI	SPVarI	strVarII	Family2C3i2	g8	ERR3601734
701680	2009	180	1	Clade_Ia	neg	nanVarI	SPVarI	strVarII	Family2C3i1	g8	ERR3601570
701681	2004	180	1	Clade_Ia	neg	nanVarI	SPVarI	strVarII	Family2C3i1	g8	ERR3601726
701682	2009	180	2	Clade_Ia	neg	nanVarI	SPVarI	strVarII	Family2C3i2	g8	ERR3601697
701683	2004	233	10	External	neg	nanVarIII	SPVarI	strVarI	Family1C2v3	g11	ERR3601776
701684	2009	180	1	Clade_Ia	neg	nanVarI	SPVarI	strVarII	Family2C3i1	g8	ERR3601794
701685	2004	180	1	Clade_Ia	neg	nanVarI	SPVarI	strVarI	Family2C3i1	g8	ERR3601596
701686	2009	180	2	Clade_Ia	neg	nanVarI	SPVarI	strVarII	Family2C3i1	g8	ERR3601623
701687	2004	180	1	Clade_Ia	neg	nanVarI	SPVarI	strVarII	Family2C3i1	g8	ERR3601680
701688	2010	180	1	Clade_Ia	neg	nanVarI	SPVarI	strVarII	Family2C3i1	g8	ERR3601947
701690	2010	180	13	Clade_Ia	neg	nanVarI	SPVarI	strVarII	Family2C3i2	g8	ERR3601930
701691	2004	180	1	Clade_Ia	neg	nanVarI	SPVarI	strVarII	Family2C3i2	g8	ERR3601709
701692	2010	700	23	External	TETM	nanVarIII	SPVarI	strVarI	Family1C2i4	g5	ERR3601826
701695	2004	180	42	Clade_Ia	neg	nanVarI	SPVarI	strVarII	Family2C3i1	g8	ERR3601768
701696	2010	180	2	Clade_Ia	neg	nanVarI	SPVarI	strVarII	Family2C3i2	g8	ERR3601722
701697	2004	180	24	Clade_Ia	neg	nanVarI	SPVarI	strVarII	Family2C3i1	g8	ERR3601830
701698	2010	180	1	Clade_Ia	neg	nanVarI	SPVarI	strVarII	Family2C3i2	g8	ERR3601624
701699	2004	180	1	Clade_Ia	neg	nanVarI	SPVarI	strVarII	Family2C3i1	G4	ERR3601965
701700	2010	180	4	Clade_II	neg	nanVarIII	SPVarI	strVarII	Family2C5v1	g6	ERR3601928
701701	2004	180	1	Clade_Ia	neg	nanVarI	SPVarI	strVarII	Family2C3i1	g8	ERR3602081
701702	2010	180	2	Clade_Ia	neg	nanVarI	SPVarI	strVarI	Family2C3i2	g8	ERR3601605
701703	2004	180	1	Clade_Ia	neg	nanVarI	SPVarI	strVarII	Family2C3i1	g8	ERR3601860
701704	2015	180	2	Clade_Ia	neg	nanVarI	SPVarI	strVarII	Family2C3i1	g8	ERR3601620
701705	2004	180	1	Clade_Ia	neg	nanVarI	SPVarI	strVarII	Family2C3i1	g8	ERR3601921
701706	2015	458	8	External	neg	-	SPVarI	strVarI	Family1C1i2	g8	ERR3601744
701707	2004	180	2	Clade_Ia	neg	nanVarI	SPVarI	strVarII	Family2C3i1	g8	ERR3601632
701709	2004	180	1	Clade_Ia	neg	nanVarI	SPVarI	strVarII	Family2C3i1	g8	ERR3601628
701710	2015	180	2	Clade_Ia	neg	nanVarI	SPVarI	strVarII	Family2C3i2	g8	ERR3601613
701711	2004	180	11	Clade_Ia	neg	nanVarI	SPVarI	strVarII	Family2C3i1	g8	ERR3601687
701712	2015	180	2	Clade_Ia	neg	nanVarI	SPVarI	strVarII	Family2C3i1	g8	ERR3601626
701713	2004	1377	5	External	neg	nanVarII	SPVarI	strVarII	Family1C1v1	g6	ERR3602068
701715	2004	180	1	Clade_Ia	neg	nanVarI	SPVarI	strVarII	Family2C3i1	g8	ERR3601729
701717	2004	180	1	Clade_Ia	neg	nanVarI	SPVarI	strVarII	Family2C3i1	g8	ERR3601642
701719	2004	180	25	Clade_Ia	neg	nanVarI	SPVarI	strVarII	Family2C3i2	g8	ERR3601658
701721	2004	180	1	Clade_Ia	neg	nanVarI	SPVarI	strVarII	Family2C3i1	g8	ERR3601560
701723	2004	180	1	Clade_Ia	neg	nanVarI	SPVarI	strVarII	Family2C3i1	g8	ERR3601733
701725	2004	180	25	Clade_Ia	neg	nanVarI	SPVarI	strVarII	Family2C3i1	g8	ERR3601762
701727	2004	180	1	Clade_Ia	neg	nanVarI	SPVarI	strVarII	Family2C3i1	g8	ERR3602022
701729	2005	180	1	Clade_Ia	neg	nanVarI	SPVarI	strVarII	Family2C3i1	g8	ERR3601717
701731	2005	12489	43	External	TETM	-	SPVarI	strVarI	Family2C4v1	g6	ERR3601847
701733	2005	180	1	Clade_Ia	neg	nanVarI	SPVarI	strVarII	Family2C3i1	g8	ERR3601832
701735	2005	180	1	Clade_Ia	neg	nanVarI	SPVarI	strVarI	Family2C3i1	g8	ERR3601763
701736	2005	180	1	Clade_Ia	neg	nanVarI	SPVarI	strVarII	Family2C3i1	g8	ERR3601706
701737	2005	NOVEL allele. Closest ST:458(SLV)	8	External	neg	-	SPVarI	strVarI	Family1C1v2	g8	ERR3601983
701738	2005	180	1	Clade_Ia	neg	nanVarI	SPVarI	strVarII	Family2C3i2	g8	ERR3601813
701739	2005	180	1	Clade_Ia	neg	nanVarI	SPVarI	strVarII	Family2C3i1	g8	ERR3601831
701740	2005	232	22	External	neg	nanVarII	SPVarI	strVarII	-	g11	ERR3602072
701741	2008	180	2	Clade_Ia	neg	nanVarI	SPVarI	strVarI	Family2C3i1	g8	ERR3601544
701742	2008	458	8	External	neg	-	SPVarI	strVarII	Family2C3i1	g8	ERR3602035
701743	2008	180	2	Clade_Ia	neg	nanVarI	SPVarI	strVarI	Family2C3i1	g8	ERR3602058
703150	2005	458	8	External	neg	-	SPVarI	strVarI	Family1C2v2	g8	ERR3601877
703151	2011	NOVEL allele. Closest ST:180(SLV)	2	Clade_Ia	neg	nanVarI	SPVarI	strVarII	Family2C3i2	g8	ERR3601856
703152	2014	180	1	Clade_Ia	neg	nanVarI	SPVarI	strVarI	Family2C3i2	g8	ERR3601742
703153	2015	180	2	Clade_Ia	neg	nanVarI	SPVarI	strVarII	Family2C3i2	g8	ERR3601996
703154	2015	180	1	Clade_Ia	neg	nanVarI	SPVarI	strVarII	Family2C3i1	g8	ERR3601960
703158	2005	180	2	Clade_Ia	neg	nanVarI	SPVarI	strVarII	Family2C3i1	g8	ERR3601578
703160	2005	180	1	Clade_Ia	neg	nanVarI	SPVarI	strVarII	Family2C3i1	g8	ERR3602001
703162	2005	180	17	Clade_Ia	neg	nanVarI	SPVarI	strVarI	Family2C3i2	g8	ERR3601539
703164	2005	700	23	External	TETM	nanVarIII	SPVarI	strVarI	Family1C2i4	g5	ERR3601885
703166	2005	1377	5	External	neg	nanVarIII	SPVarI	strVarII	Family1C1v1	g9	ERR3602014
703168	2005	180	1	Clade_Ia	neg	nanVarI	SPVarI	strVarII	Family2C3i1	g8	ERR3601862
703170	2005	180	17	Clade_Ia	neg	nanVarI	SPVarI	strVarI	Family2C3i2	g8	ERR3601665
703172	2005	180	1	Clade_Ia	neg	nanVarI	SPVarI	strVarII	Family2C3i2	g8	ERR3601647
703174	2005	458	8	External	neg	-	SPVarII	strVarII	Family1C1v2	g8	ERR3601591
703176	2005	180	1	Clade_Ia	neg	nanVarI	SPVarI	strVarII	Family2C3i1	g8	ERR3601894
703178	2006	180	1	Clade_Ia	neg	nanVarI	SPVarI	strVarII	Family2C3i1	g8	ERR3601802
703180	2006	180	1	Clade_Ia	neg	nanVarI	SPVarI	strVarII	Family2C3i1	g8	ERR3601861
703182	2006	180	17	Clade_Ia	neg	nanVarI	SPVarI	strVarI	Family2C3i1	g8	ERR3601715
703184	2006	180	2	Clade_Ia	neg	nanVarI	SPVarI	strVarII	Family2C3i1	g8	ERR3601775
703186	2006	180	1	Clade_Ia	neg	nanVarI	SPVarI	strVarII	Family2C3i2	g8	ERR3602083
703188	2006	180	1	Clade_Ia	neg	nanVarI	SPVarI	strVarII	Family2C3i1	g8	ERR3601957
703190	2006	180	1	Clade_Ia	neg	nanVarI	SPVarI	strVarII	Family2C3i1	g8	ERR3601937
703192	2006	NOVEL allele. Closest ST:180(SLV)	1	Clade_Ia	neg	nanVarI	SPVarI	strVarII	Family2C3i1	g8	ERR3601643
703194	2006	180	1	Clade_Ia	neg	nanVarI	SPVarI	strVarII	Family2C3i1	g8	ERR3601508
703196	2006	180	1	Clade_Ia	neg	nanVarI	SPVarI	strVarII	Family2C3i1	g8	ERR3601964
703198	2006	1220	7	External	neg	nanVarII	SPVarI	strVarI	Family2C5i1	g6	ERR3602018
703200	2006	180	2	Clade_Ia	neg	nanVarI	SPVarI	strVarII	Family2C3i1	g8	ERR3601535
703202	2006	180	1	Clade_Ia	neg	nanVarIII	SPVarI	strVarII	Family2C3i2	g8	ERR3601731
703204	2006	180	1	Clade_Ia	neg	nanVarI	SPVarI	strVarII	Family2C3i1	g8	ERR3601755
703206	2006	180	2	Clade_Ia	neg	nanVarI	SPVarI	strVarII	Family2C3i2	g8	ERR3602051
703208	2006	180	1	Clade_Ia	neg	nanVarI	SPVarI	strVarI	Family2C3i1	g8	ERR3602064
703210	2006	180	1	Clade_Ia	neg	nanVarI	SPVarI	strVarII	Family2C3i1	g8	ERR3601671
703214	2006	180	2	Clade_Ia	neg	nanVarI	SPVarI	strVarII	Family2C3i1	g8	ERR3601936
703216	2006	180	1	Clade_Ia	neg	nanVarI	SPVarI	strVarII	Family2C3i1	g8	ERR3601530
703218	2006	180	1	Clade_Ia	neg	nanVarI	SPVarI	strVarII	Family2C3i2	g8	ERR3601583
703220	2006	458	8	External	neg	-	SPVarI	strVarI	Family1C1v2	g8	ERR3601590
703222	2006	1220	7	External	neg	nanVarII	SPVarI	strVarI	Family2C5i1	g6	ERR3602017
703224	2007	180	1	Clade_Ia	neg	nanVarI	SPVarI	strVarII	Family2C3i2	g8	ERR3601895
703226	2007	180	2	Clade_Ia	neg	nanVarI	SPVarI	strVarII	Family2C3i1	g8	ERR3601821
703228	2007	180	2	Clade_Ia	neg	nanVarI	SPVarI	strVarI	Family2C3i1	g8	ERR3601721
703230	2007	180	1	Clade_Ia	neg	nanVarI	SPVarI	strVarI	Family2C3i1	g8	ERR3601627
703232	2007	180	1	Clade_Ia	neg	nanVarI	SPVarI	strVarI	Family2C3i1	g8	ERR3601874
703234	2007	180	1	Clade_Ia	neg	nanVarI	SPVarI	strVarII	Family2C3i1	g8	ERR3601511
703236	2007	180	11	Clade_Ia	neg	nanVarI	SPVarI	strVarI	Family2C3i1	g8	ERR3601681
703238	2007	180	2	Clade_Ia	neg	nanVarI	SPVarI	strVarII	Family2C3i2	g8	ERR3601741
703240	2007	180	24	Clade_Ia	neg	nanVarI	SPVarI	strVarI	Family2C3i1	g8	ERR3601838
703242	2007	260	9	External	neg	nanVarII	SPVarI	strVarI	Family2C5i1	g6	ERR3601504
703244	2007	180	1	Clade_Ia	neg	nanVarI	SPVarI	strVarI	Family2C3i1	g8	ERR3602037
703246	2007	1220	7	External	neg	nanVarII	SPVarI	strVarI	Family2C5i1	g6	ERR3602025
703248	2007	180	1	Clade_Ia	neg	nanVarI	SPVarI	strVarI	Family2C3i2	g8	ERR3601997
703250	2007	180	1	Clade_Ia	neg	nanVarI	SPVarI	strVarII	Family2C3i2	g8	ERR3602065
703252	2007	260	9	External	neg	nanVarII	SPVarI	strVarI	Family2C5i1	g3	ERR3601748
703254	2007	505	44	Clade_Ib	neg	nanVarIII	SPVarII	strVarI	Family1C1i2	g11	ERR3601728
703256	2007	180	1	Clade_Ia	neg	nanVarI	SPVarI	strVarII	Family2C3i1	g8	ERR3601622
703259	2007	180	1	Clade_Ia	neg	nanVarI	SPVarI	strVarII	Family2C3i1	g8	ERR3601584
703262	2007	180	1	Clade_Ia	neg	nanVarI	SPVarI	strVarII	Family2C3i1	g8	ERR3602066
703266	2007	180	1	Clade_Ia	neg	nanVarI	SPVarI	strVarI	Family2C3i2	g8	ERR3601868
703269	2007	180	1	Clade_Ia	neg	nanVarI	SPVarI	strVarI	Family2C3i2	g8	ERR3601816
703272	2007	180	1	Clade_Ia	neg	nanVarI	SPVarI	strVarII	Family2C3i2	g8	ERR3602026
703275	2007	180	1	Clade_Ia	neg	nanVarI	SPVarI	strVarII	Family2C3i1	g8	ERR3602032
703279	2007	1377	5	External	neg	nanVarII	SPVarI	strVarII	Family1C1v1	g2	ERR3601645
703282	2007	180	1	Clade_Ia	neg	nanVarI	SPVarI	strVarI	Family2C3i1	g8	ERR3601785
703285	2007	180	1	Clade_Ia	neg	nanVarI	SPVarI	strVarII	Family2C3i1	g8	ERR3602034
703288	2007	180	1	Clade_Ia	neg	nanVarI	SPVarI	strVarII	Family2C3i1	g8	ERR3602049
703291	2008	180	1	Clade_Ia	neg	nanVarI	SPVarI	strVarII	Family2C3i2	g8	ERR3601711
703295	2008	180	1	Clade_Ia	neg	nanVarI	SPVarI	strVarI	Family2C3i1	g8	ERR3601842
703298	2008	180	1	Clade_Ia	neg	nanVarI	SPVarI	strVarII	Family2C3i1	g8	ERR3601720
703301	2008	180	1	Clade_Ia	neg	nanVarI	SPVarI	strVarII	Family2C3i1	g8	ERR3601592
703304	2008	180	1	Clade_Ia	neg	nanVarI	SPVarI	strVarII	Family2C3i1	g8	ERR3601548
703308	2008	180	1	Clade_Ia	neg	nanVarI	SPVarI	strVarII	Family2C3i1	g8	ERR3601999
703311	2008	180	1	Clade_Ia	neg	nanVarI	SPVarI	strVarII	Family2C3i1	g8	ERR3601875
703314	2008	180	1	Clade_Ia	neg	nanVarI	SPVarI	strVarI	Family2C3i2	g8	ERR3601497
703317	2008	180	2	Clade_Ia	neg	nanVarI	SPVarI	strVarII	Family2C3i1	g8	ERR3601542
703320	2008	180	1	Clade_Ia	neg	nanVarI	SPVarI	strVarII	Family2C3i1	g8	ERR3601772
703324	2008	180	1	Clade_Ia	neg	nanVarI	SPVarI	strVarII	Family2C3i1	g8	ERR3601615
703327	2016	180	1	Clade_Ia	neg	nanVarI	SPVarI	strVarII	Family2C3i1	g8	ERR3602054
703330	2016	180	4	Clade_II	neg	nanVarIII	SPVarI	strVarII	Family2C5i1	g6	ERR3601704
703333	2016	180	4	Clade_II	neg	nanVarIII	SPVarI	strVarII	Family2C5i1	g6	ERR3601766
703335	2016	180	2	Clade_Ia	neg	nanVarI	SPVarI	strVarI	Family2C3i1	g8	ERR3601796
703338	2016	180	2	Clade_Ia	neg	nanVarI	SPVarI	strVarII	Family2C3i1	g8	ERR3601594
703340	2016	180	1	Clade_Ia	neg	nanVarI	SPVarI	strVarII	Family2C3i1	g8	ERR3601988
703342	2017	180	1	Clade_Ia	neg	nanVarI	SPVarI	strVarII	Family2C3i1	g8	ERR3601870
703344	2017	1377	5	External	neg	nanVarII	SPVarI	strVarII	Family1C1v1	g2	ERR3601987
703346	2017	180	4	Clade_II	neg	nanVarIII	SPVarI	strVarI	Family2C5i1	g6	ERR3601774
704245	2004	180	1	Clade_Ia	neg	nanVarI	SPVarI	strVarI	Family2C3i1	g8	ERR3601675
704246	2005	180	1	Clade_Ia	neg	nanVarI	SPVarI	strVarII	Family2C3i1	g8	ERR3601566
704247	2005	180	45	Clade_Ia	neg	nanVarI	SPVarI	strVarII	Family2C3i1	g8	ERR3601540
704248	2005	180	2	Clade_Ia	neg	nanVarI	SPVarI	strVarI	Family2C3i1	g8	ERR3601750
704249	2005	180	1	Clade_Ia	neg	nanVarI	SPVarI	strVarII	Family2C3i2	g8	ERR3601852
704250	2005	180	1	Clade_Ia	neg	nanVarI	SPVarI	strVarII	Family2C3i2	g8	ERR3601958
704251	2007	180	2	Clade_Ia	neg	nanVarI	SPVarI	strVarII	Family2C3i1	g8	ERR3601677
704252	2008	1220	7	External	neg	nanVarII	SPVarI	strVarI	Family2C5i1	g6	ERR3601505
704274	2015	180	2	Clade_Ia	neg	nanVarI	SPVarI	strVarII	Family2C3i1	g8	ERR3601747
704275	2016	180	2	Clade_Ia	neg	nanVarI	SPVarI	strVarII	Family2C3i1	g8	ERR3601967
706573	2003	180	1	Clade_Ia	neg	nanVarI	SPVarI	strVarII	Family2C3i1	g8	ERR3601904
706591	2005	180	2	Clade_Ia	neg	nanVarI	SPVarI	strVarII	Family2C3i1	g8	ERR3601545
706600	2006	180	1	Clade_Ia	neg	nanVarI	SPVarI	strVarII	Family2C3i1	g8	ERR3601805
706601	2006	458	8	External	neg	-	SPVarI	strVarI	Family2C3i1	g8	ERR3602031
706602	2006	233	10	External	neg	nanVarIII	SPVarI	strVarI	Family1C2v3	g11	ERR3601517
706603	2006	180	1	Clade_Ia	neg	nanVarI	SPVarI	strVarII	Family2C3i1	g8	ERR3601835
706604	2006	180	1	Clade_Ia	neg	nanVarI	SPVarI	strVarI	Family2C3i1	g8	ERR3601634
706605	2006	180	2	Clade_Ia	neg	nanVarI	SPVarI	strVarII	Family2C3i1	g8	ERR3602007
706606	2007	233	10	External	neg	nanVarI	SPVarI	strVarI	Family1C2v3	g11	ERR3601521
706618	2013	180	2	Clade_Ia	neg	nanVarI	SPVarI	strVarII	Family2C3i1	g8	ERR3601833
706619	2017	180	3	Clade_II	TET	nanVarIII	SPVarI	strVarII	Family2C5i1	g6	ERR3602052
706620	2017	180	3	Clade_II	TET	nanVarIII	SPVarI	strVarII	Family2C5i1	g6	ERR3602008
706621	2017	1377	5	External	neg	nanVarII	SPVarI	strVarII	Family1C1v1	g6	ERR3601935
706622	2017	180	1	Clade_Ia	neg	nanVarI	SPVarI	strVarII	Family2C3i2	g8	ERR3601907
710507	2010	180	2	Clade_Ia	neg	nanVarI	SPVarI	strVarI	Family2C3i2	g8	ERR3601607
710528	2009	233	10	External	neg	nanVarIII	SPVarI	strVarI	Family1C2v3	g11	ERR3602011
710531	2009	180	1	Clade_Ia	neg	nanVarI	SPVarI	strVarI	Family2C3i1	g8	ERR3601531
717902	2013	180	1	Clade_Ia	neg	nanVarI	SPVarI	strVarII	Family2C3i2	g8	ERR3530475
720198	2009	180	1	Clade_Ia	neg	nanVarI	SPVarI	strVarII	Family2C3i2	g8	ERR3530561
720199	2009	180	1	Clade_Ia	neg	nanVarI	SPVarI	strVarII	Family2C3i2	g8	ERR3530705
720210	2009	180	1	Clade_Ia	neg	nanVarI	SPVarI	strVarII	Family2C3i1	g8	ERR3530920
720248	2009	180	2	Clade_Ia	neg	nanVarI	SPVarI	strVarII	Family2C3i1	g8	ERR3530764
720249	2009	180	2	Clade_Ia	neg	nanVarI	SPVarI	strVarII	Family2C3i2	g8	ERR3530911
720252	2009	180	1	Clade_Ia	neg	nanVarI	SPVarI	strVarII	Family2C3i2	g8	ERR3530912
756613	2002	180	1	Clade_Ia	neg	nanVarI	SPVarI	strVarI	Family2C3i1	g8	ERR3530278
756681	2002	180	1	Clade_Ia	neg	nanVarI	SPVarI	strVarII	Family2C3i1	g8	ERR3530319
759505	2002	180	1	Clade_Ia	neg	nanVarI	SPVarI	strVarII	Family2C3i2	g8	ERR3530628
697994	2014	1377	5	Failed	neg	nanVarIII	SPVarI	strVarII	Family1C1v1	g9	ERR3601986
699721	2014	180	2	Failed	neg	nanVarI	SPVarI	strVarI	-	g8	ERR3602069
699772	2015	180	6	Failed	neg	nanVarIII	SPVarI	strVarI	Family1C1i3	g6	ERR3601732
701676	2009	180	40	Failed	neg	nanVarI	SPVarI	strVarII	Family2C3i2	g8	ERR3601981
701693	2004	378	41	Failed	neg	nanVarII	SPVarI	strVarII	Family1C1v1	g11	ERR3601557
701708	2015	458	8	Failed	neg	nanVarIII	SPVarI	strVarI	Family1C2v1	g8	ERR3601896
703212	2006	458	8	Failed	neg	nanVarI	SPVarI	strVarI	Family1C1v2	g8	ERR3602029
